# Supplementary material
Source: Copernicus journal article supplement (doi:10.5194/egusphere-2026-3264)
Supplement: Supplementary file 1 [file egusphere-2026-3264-supplement.pdf]

# Supplementary material

## Section S1

### Chemical characterization and phase identification of starting material

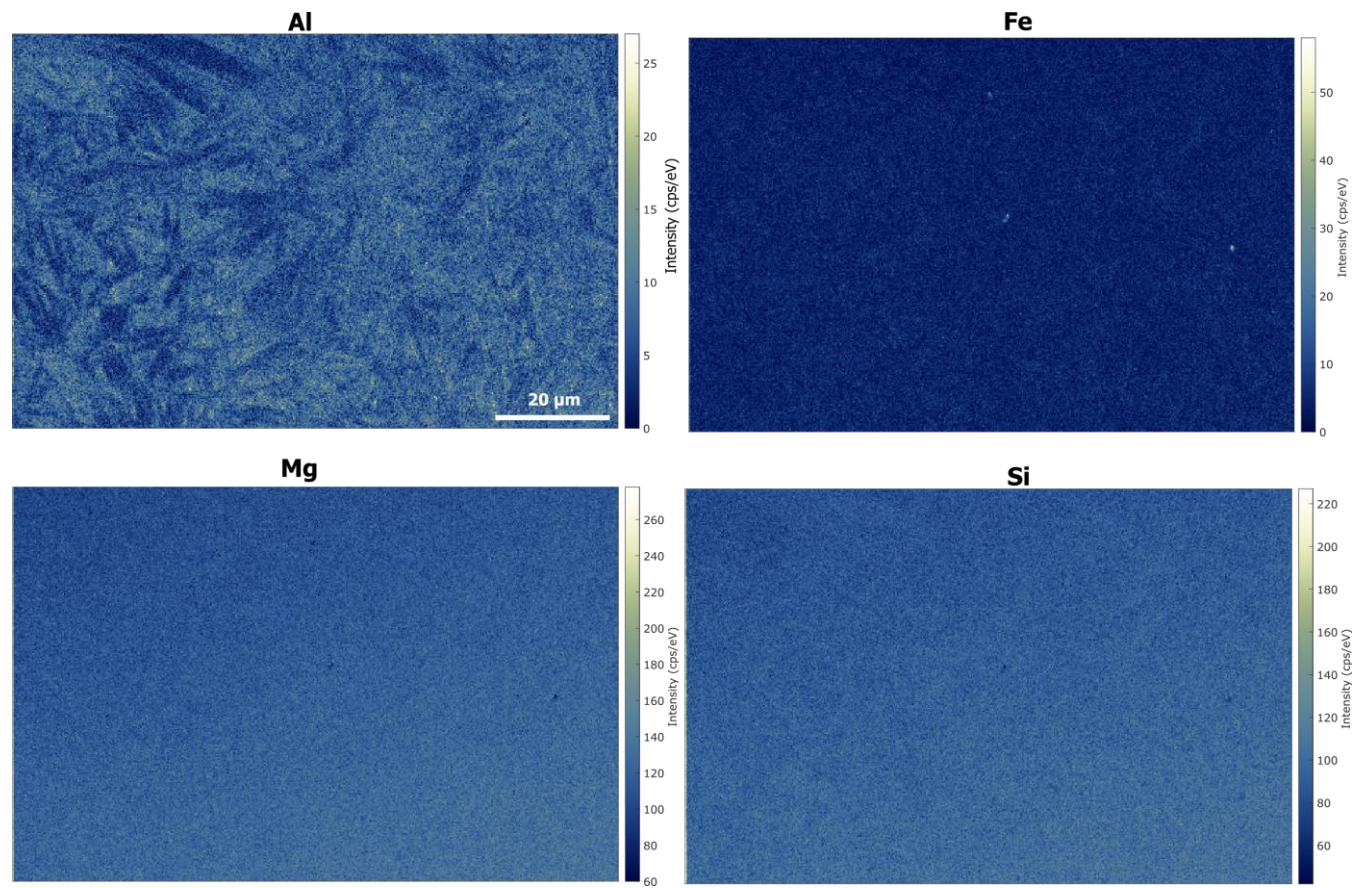

5 Supplementary figure S 1- Energy Dispersive X-ray Spectroscopy (EDS) map of aluminum (Al); Iron(Fe);Magnesium (Mg) and Silica(Si) in the serpentine matrix.

**Baseline-Corrected vs Fitted Spectrum**

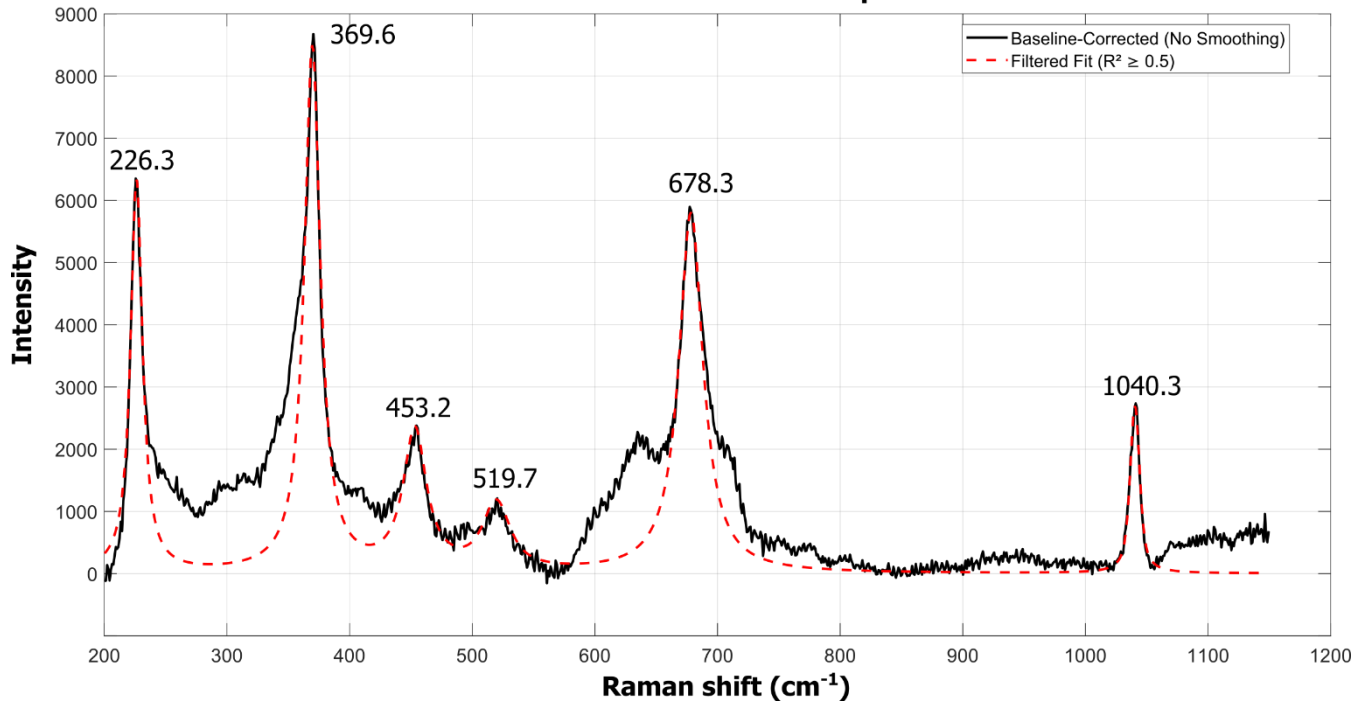

Supplementary figure S 2 - Raman spectrum of antigorite. Although the peaks are slightly lower than characteristic peaks of antigorite (688, 520, 378 cm<sup>-1</sup>), they are distinct from lizardite peak positions (690, 510, 378 cm<sup>-1</sup>).

## Electron Probe Micro-Analysis (EPMA) of mineral phases

Supplementary Table S 1 - Elemental composition of serpentine minerals in the starting material.

| <b>Elements</b> | <b>Antigorite<br/>(wt%)</b> | <b><math>\sigma</math></b> | <b>Al-Antigorite<br/>(wt%)</b> | <b><math>\sigma</math></b> | <b>Diopside<br/>(wt%)</b> | <b><math>\sigma</math></b> | <b>Magnetite<br/>(wt%)</b> | <b><math>\sigma</math></b> | <b>Pentlandite<br/>(wt%)</b> | <b><math>\sigma</math></b> |
|-----------------|-----------------------------|----------------------------|--------------------------------|----------------------------|---------------------------|----------------------------|----------------------------|----------------------------|------------------------------|----------------------------|
| <b>Na</b>       | b.d.l                       | b.d.l                      | b.d.l                          | b.d.l                      | 0.709                     | 0.60                       | b.d.l                      | b.d.l                      | b.d.l                        | b.d.l                      |
| <b>Si</b>       | 19.994                      | 0.27                       | 16.076                         | 1.47                       | 25.041                    | 0.64                       | 1.238                      | 1.92                       | b.d.l                        | b.d.l                      |
| <b>Mg</b>       | 23.372                      | 0.34                       | 20.847                         | 1.01                       | 9.687                     | 1.00                       | 1.778                      | 2.64                       | b.d.l                        | b.d.l                      |
| <b>Al</b>       | 0.770                       | 0.32                       | 6.971                          | 2.37                       | 1.666                     | 1.51                       | 0.237                      | 0.38                       | b.d.l                        | b.d.l                      |
| <b>Fe</b>       | 2.730                       | 0.45                       | 2.697                          | 0.35                       | 1.465                     | 0.29                       | 64.939                     | 8.68                       | 21.652                       | 4.88                       |
| <b>Cr</b>       | b.d.l                       | b.d.l                      | 0.189                          | 0.18                       | 0.270                     | 0.17                       | 0.230                      | 0.03                       | b.d.l                        | b.d.l                      |
| <b>Ni</b>       | 0.127                       | 0.02                       | 0.180                          | 0.04                       | b.d.l                     | b.d.l                      | 0.316                      | 0.05                       | 41.195                       | 4.70                       |
| <b>Ca</b>       | b.d.l                       | b.d.l                      | b.d.l                          | b.d.l                      | 16.513                    | 1.23                       | b.d.l                      | b.d.l                      | b.d.l                        | b.d.l                      |
| <b>S</b>        | b.d.l                       | b.d.l                      | b.d.l                          | b.d.l                      | b.d.l                     | b.d.l                      | b.d.l                      | b.d.l                      | 32.591                       | 0.62                       |
| <b>O</b>        | 48.243                      | 0.64                       | 47.817                         | 0.84                       | 42.276                    | 0.50                       | 29.854                     | 4.36                       | b.d.l                        | b.d.l                      |
| <b>Total</b>    | 95.287                      | 0.70                       | 94.854                         | 0.71                       | 97.656                    | 0.54                       | 98.626                     | 0.62                       | 95.649                       | 0.83                       |

## EBSD analysis of starting material

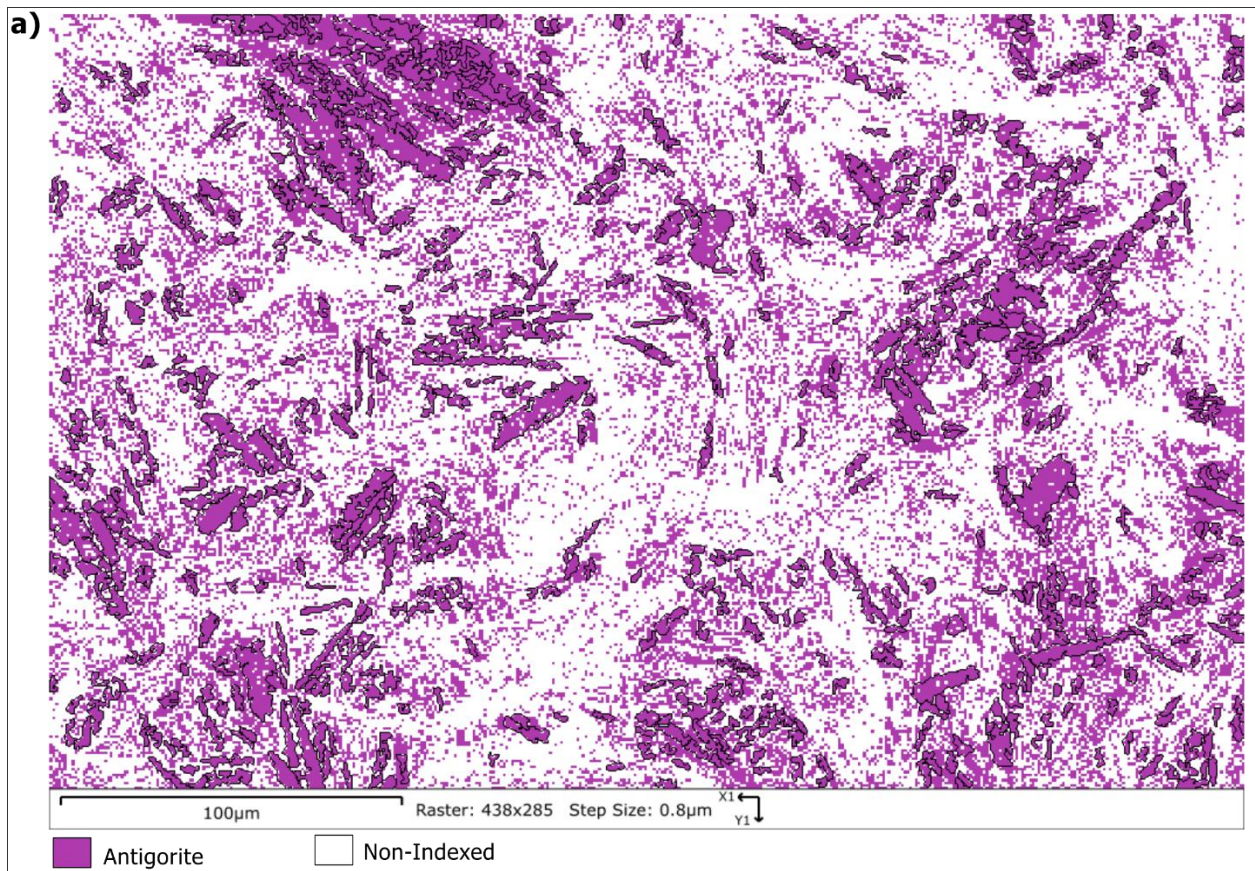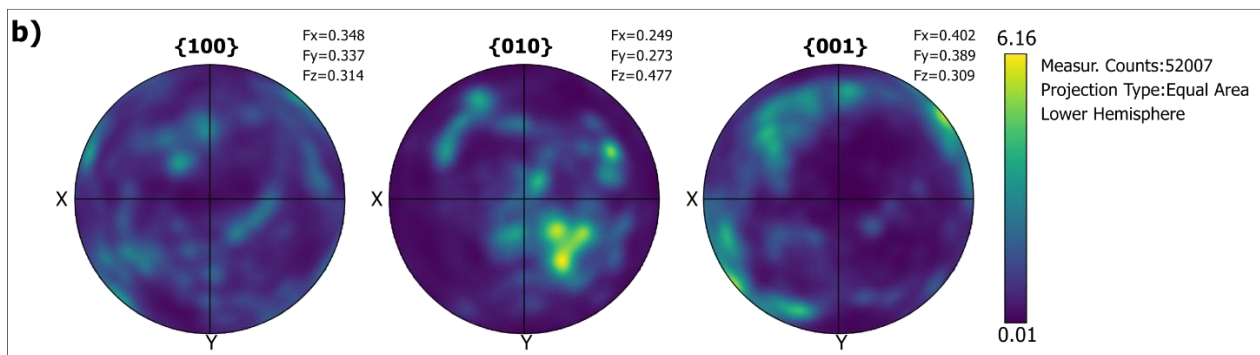

15

Supplementary figure S 3 - (a) Phase map of serpentine; the Oxford database antigorite superstructure provided the best indexing results. (b) Pole figures of serpentine. Data processed with MTEX, pole figures are showing upper hemispheres.

20 HR-TEM of antigorite in the short deformation experiment M928

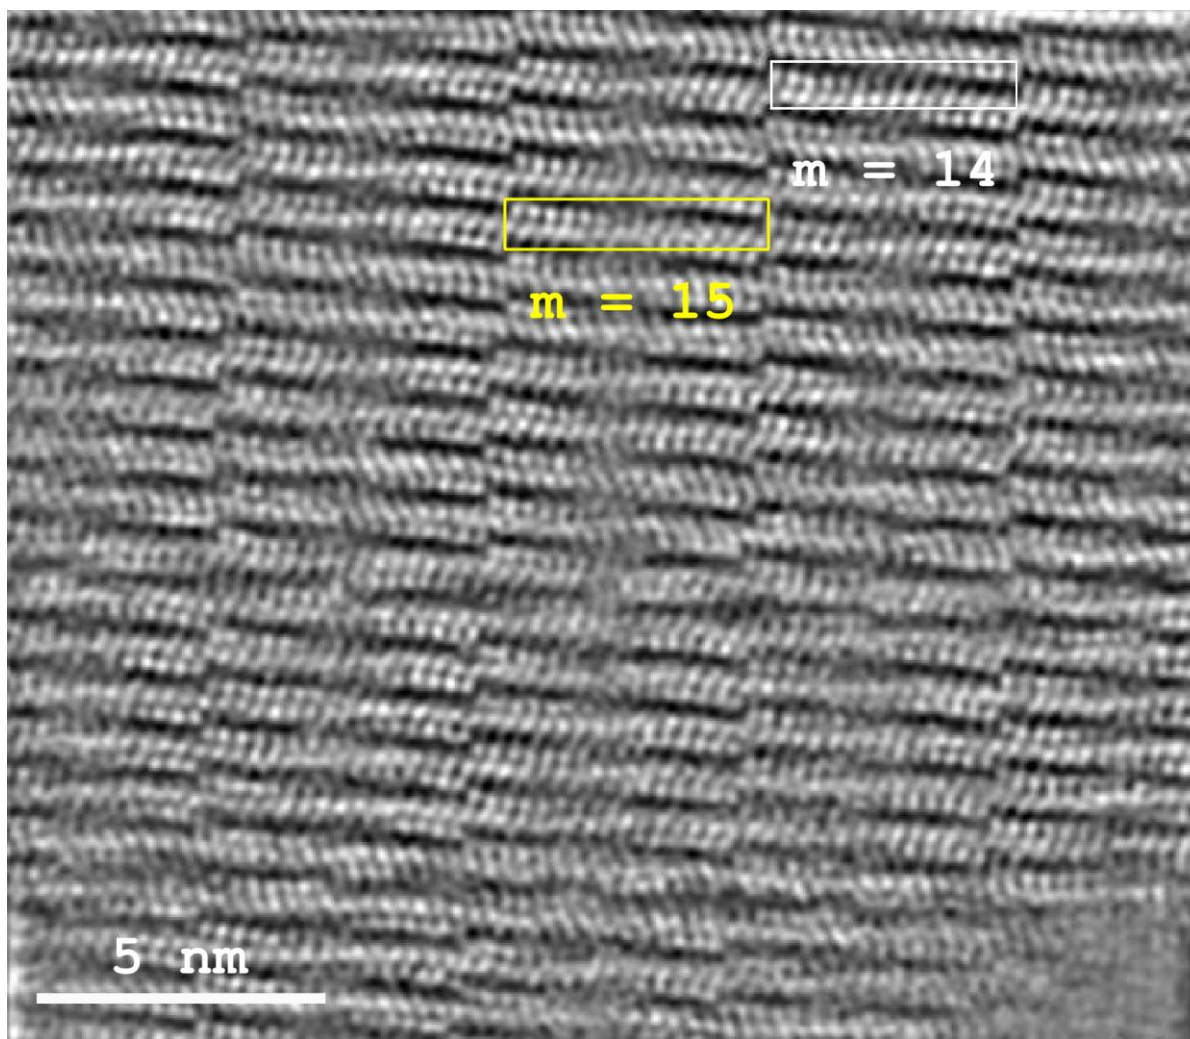

Supplementary figure S 4 - The direct observation of the tetrahedral and octahedral sites in a deformed antigorite ( $m = 14$  and  $15$ ): high-resolution STEM-HAADF images using non-Cs corrected STEM.
